# Supplementary material for: Detection of Circulating Parasite-Derived MicroRNAs in Filarial Infections
Source: PLoS Negl Trop Dis. 2014 Jul 17;8(7):e2971. doi: 10.1371/journal.pntd.0002971 (PMC4102413; doi:10.1371/journal.pntd.0002971)
Supplement: Table S7 — Detailed RT-qPCR information for miR-71. (XLSX) [file pntd.0002971.s007.xlsx]

## Sheet: S7_miR-71
Table S7: RT-qPCR information for miR-71
Mature Sequence	Stem-loop RT primer	Forward Primer	Reverse Primer	Hydrolysis Probe	Amplicon	Amplicon Length
TGAAAGACATGGGTAGTGAGACG	GTC GTA TCC AGT GCA GGG TCC GAG GTA TTC GCA CTG GAT ACG AC CGT CTC	TCG GGT AAT GAA AGA C AT GGG TAG T	CCA GTG CAG GGT CCG AGG TA	(FAM) C TGG ATA CGA CCG TCT C (MGB)(quencher)	TCG GGT AAT GAA AGA CAT GGG TAG TGA GAC GGT CGT ATC CAG TGC GAA TAC CTC GGA CCC TGC ACT GG	68 nt
FAM: fluorecein amidite moiety
MGB: minor groove binder
	Experiment 1		Experiment 2		Experiment 3
	Average Ct (from duplicates)	std deviation	Average Ct (from duplicates)	std deviation	Average Ct (from duplicates)	std deviation
A	-	-	-	-	-	-
B	-	-	-	-	-	-
C	-	-	-	-	-	-
D	-	-	-	-	-	-
Dim1	31.18	0.15	29.32	0.15	30.67	0.05
Dim2	35.14	0.43	33.38	0.15	33.94	0.05
Dim3	31	0.12	29.51	0.1	31.06	0.07
Dim4	29.57	0.02	28.11	0.02	29.92	0.77
Bpa1	33.73	0.2	32.57	0.82	33.3	0.2
Bpa2	31.94	0.06	30.71	0.1	31.95	0.04
Standard 108	21.93	0.03	22.15	0.09	23.31	0.03
Standard 107	25.37	0	26.57	0.05	28	0.16
Standard 106	28.63	0.03	30.29	0.02	31.87	0.57
Standard 105	32.04	0.11	34.11	0.51	35.11	0.2
Standard 104	35.01	0.26	39.03	1.19	40	0.87
qPCR efficiency	1.02		0.75		0.77
